# Supplementary material
Source: publisher site journal article supplement (https://static.cambridge.org/content/id/urn:cambridge.org:id:article:S0022112015001093/resource/name/FLM1500109Supp.zip)
Supplement: Supplementary file 2 [file FLM1500109Supp.zip]

Archive with 1 entries (1 files):
- FLM_1500109_SupplementaryMaterial.pdf
